# Supplementary material
Source: PubMed Central journal article supplement (PMC307657)

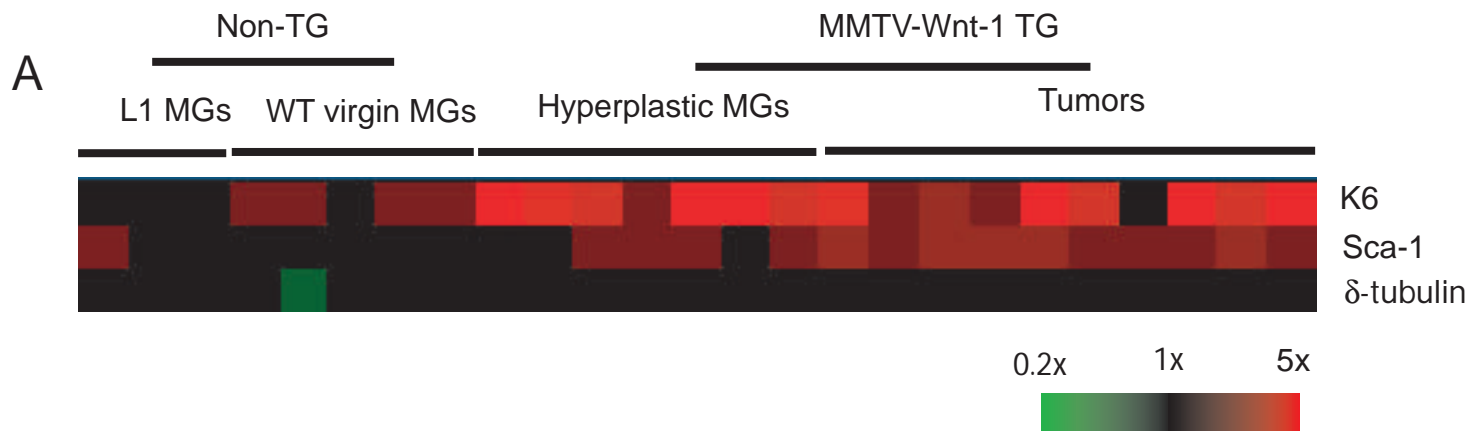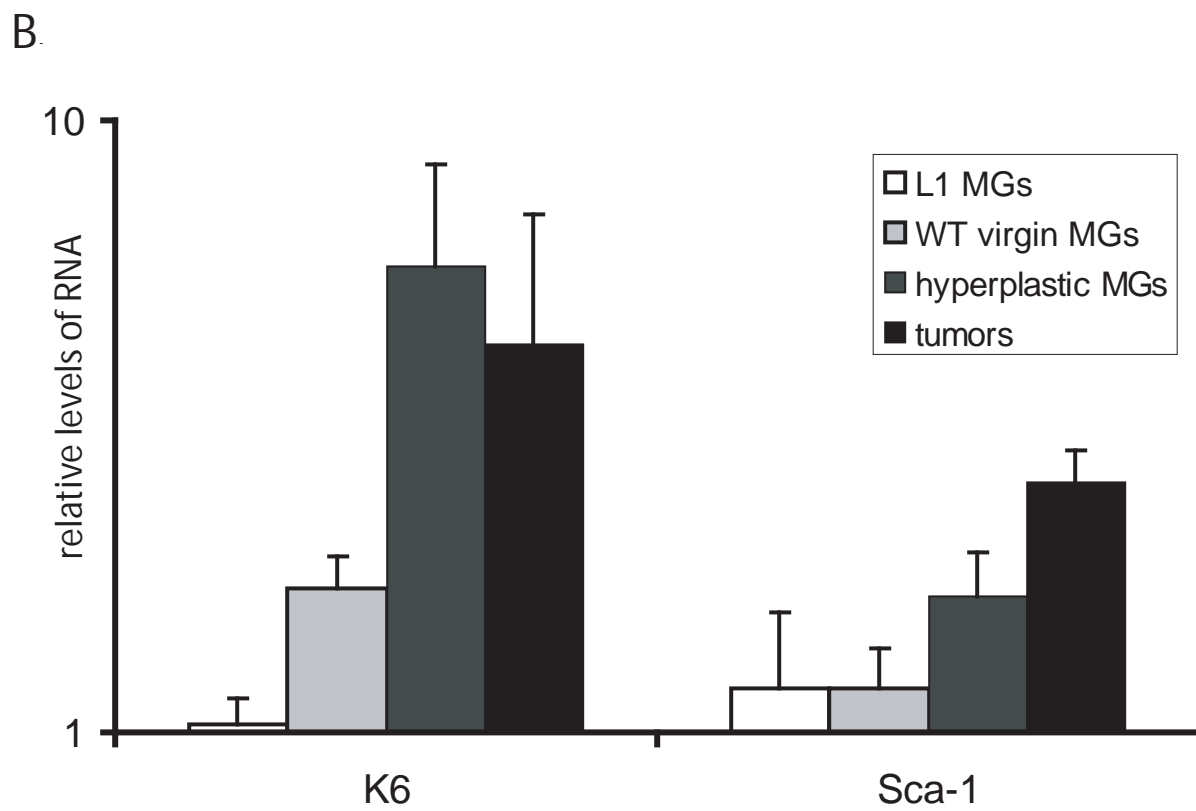

Supplement: pnas_100_26_15853__2.pdf [file pnas_100_26_15853__2.pdf]
